# Supplementary material
Source: publisher site journal article supplement (https://www.dovepress.com/article/234913)
Supplement: Supplementary file 1 [file get_supplementary_file.php]

**Supplementary-figure1**. Bar graph showed DC differences among HIV+/cART+, HIV+/cART- and HC groups.

Notes: Mean z value of DC was extracted from each ROI with significant DC difference among three groups. Asterisk: significantly different (P < 0.05); error bar: standard error of mean.

Abbreviations: DC, functional connectivity density; HIV+/syphilis+, HIV patients with syphilis coinfection; HIV+/syphilis-, HIV patients without syphilis coinfection; HC, healthy controls; IFC (Oper/Tri), inferior Frontal cortex (Oper/Tri); PCC/PCu, posterior cingulated cortex/precuneus; IPL , inferior parietal lobe; OFC, orbital frontal cortex; LOC, lateral occipital cortex.

**Supplementary Table 1** **Neurocognitive scales and corresponding cognitive domains**

| **Neurocognitive scales** | **Cognitive domains** |
| --- | --- |
| Animal Verbal Fluency Test (AFT) | Verbal fluency |
| Wisconsin Card Sorting Tests (WCST-64) | Executive function |
| Trail Marking Test A (TMT- A) | Speed of information processing |
| Grooved Pegboard (dominant and non-dominant Hands) | Complex motor skills |
| Continuous Performance Test-Identical Pair (CPT-IP)  Wechsler Memory Scale (WMS-Ⅲ)  Paced Auditory Serial Addition Test (PASAT) | Attention/working memory  (three tests) |
| Hopking Verbal Learning Test (HVLT-R)  Brief Visuospatial Memory Test (BVMT-R) | Learning and delayed recall  (two tests) |
